# Supplementary material for: Correlated missing linker defects increase thermal conductivity in metal–organic framework UiO-66
Source: Royal Society of Chemistry journal article supplement (doi:10.1039/d2sc06120a), 2023-01-01
Supplement: d2sc06120a1.pdf [file d2sc06120a1.pdf]

## Supporting Information

### Correlated Missing Linker Defects Increase Thermal Conductivity in Metal-Organic Framework UiO-66

Meiirbek Islamov<sup>1</sup>, Paul Boone<sup>1</sup>, Hasan Babaei<sup>2</sup>, Alan J. H. McGaughey<sup>3</sup>, Christopher E. Wilmer\*<sup>1, 4</sup>

<sup>1</sup>Department of Chemical & Petroleum Engineering, University of Pittsburgh, Pittsburgh, Pennsylvania 15261, United States

<sup>2</sup>Department of Chemistry, University of California, Berkeley, Berkeley, California 94720, United States

<sup>3</sup>Department of Mechanical Engineering, Carnegie Mellon University, Pittsburgh, Pennsylvania 15213, United States

<sup>4</sup>Department of Electrical & Computer Engineering, University of Pittsburgh, Pittsburgh, Pennsylvania 15261, United States

#### Included Sections

- 1. Thermal conductivity and correlation time plots for correlated defect nanoregions.**
- 2. Relationship between thermal conductivity and defect concentration.**
- 3. Relationship between mass density and defect concentration.**
- 4. Phonon dispersion relations.**
- 5. Vibrational density of states (DOS).**

# 1. Thermal conductivity as a function of correlation time plots for correlated defect nanoregions.

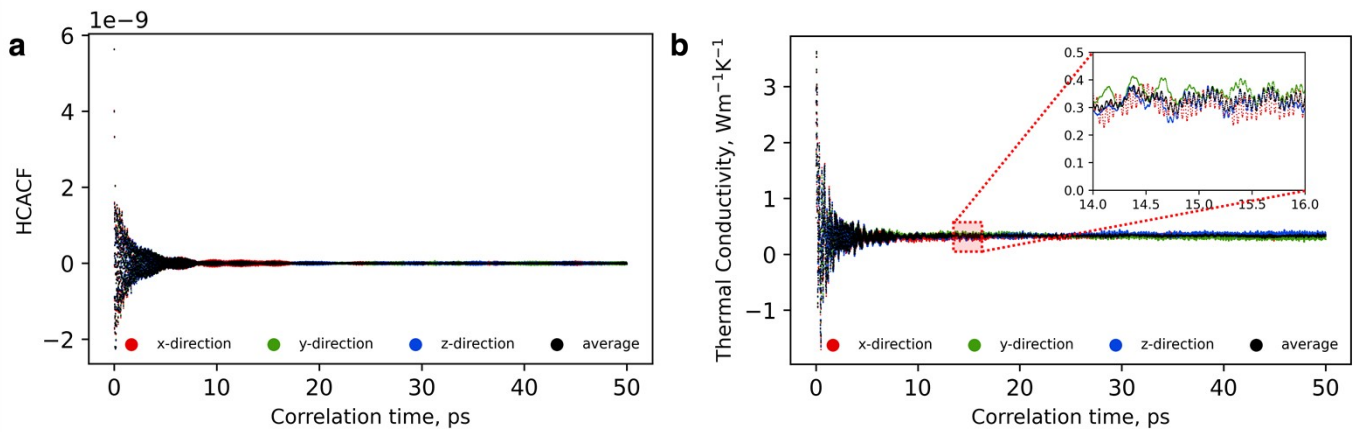

**Figure S1.** The HCACF (a) and thermal conductivity (b) plotted as a function of correlation time for pristine UiO-66 (3x3x3 supercells).

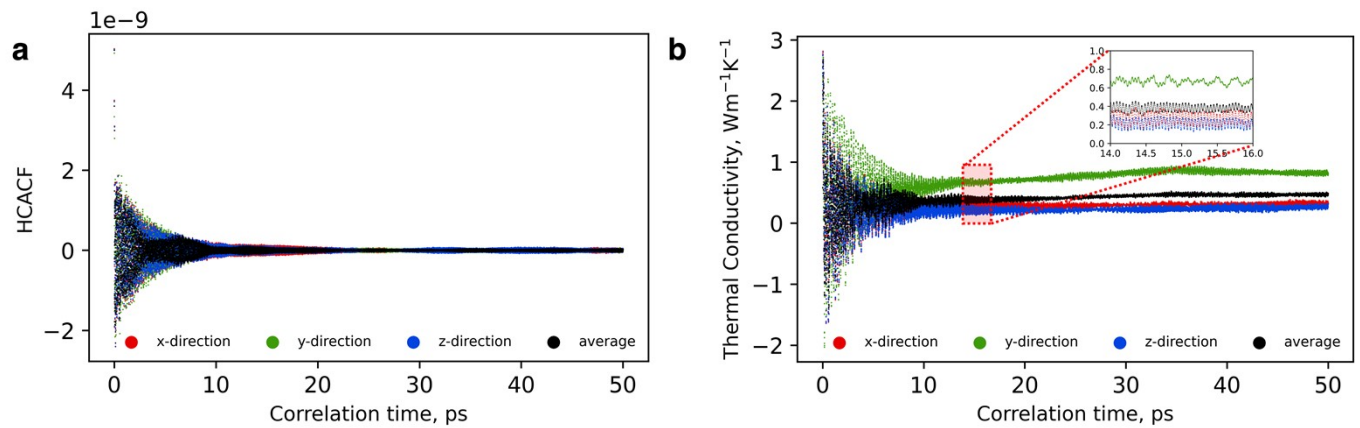

**Figure S2.** The HCACF (a) and thermal conductivity (b) plotted as a function of correlation time for missing linker correlated defect nanoregions (bcu topology).

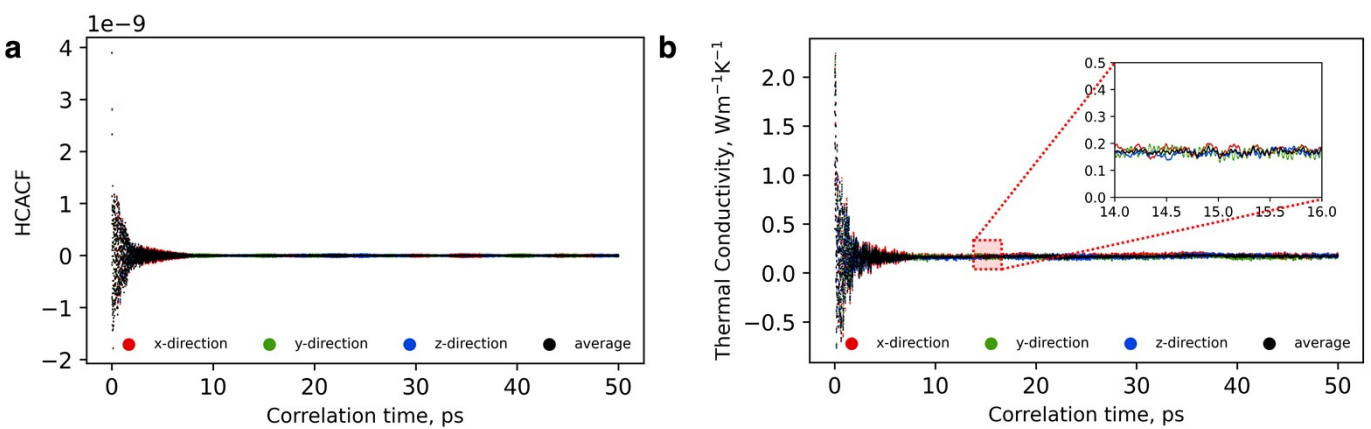

**Figure S3.** The HCACF (a) and thermal conductivity (b) plotted as a function of correlation time for missing cluster correlated defect nanoregions (reo topology).

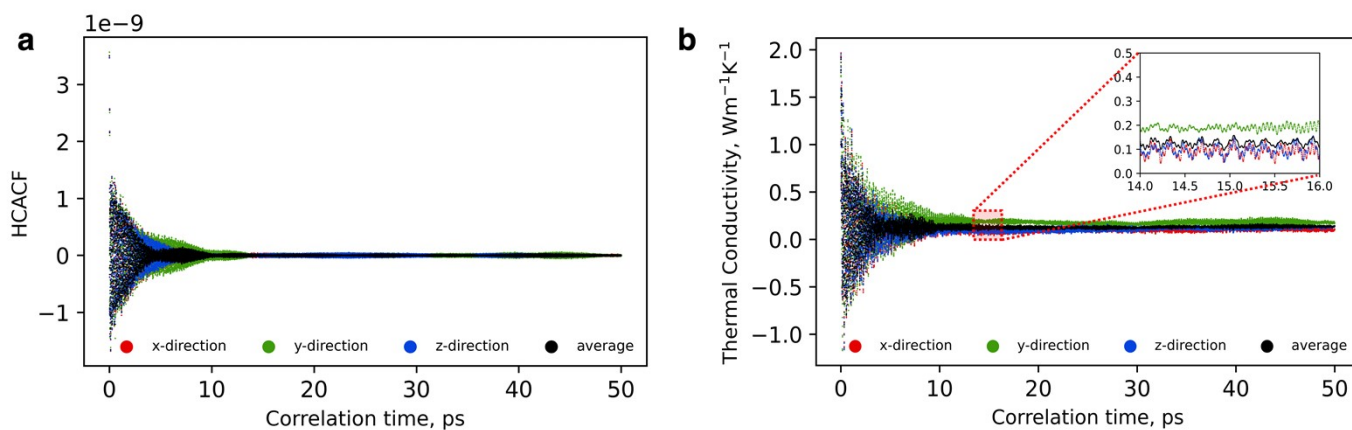

**Figure S4.** The HCACF (a) and thermal conductivity (b) plotted as a function of correlation time for missing cluster correlated defect nanoregions (scu topology).

## 2. Relationship between thermal conductivity and defect concentration

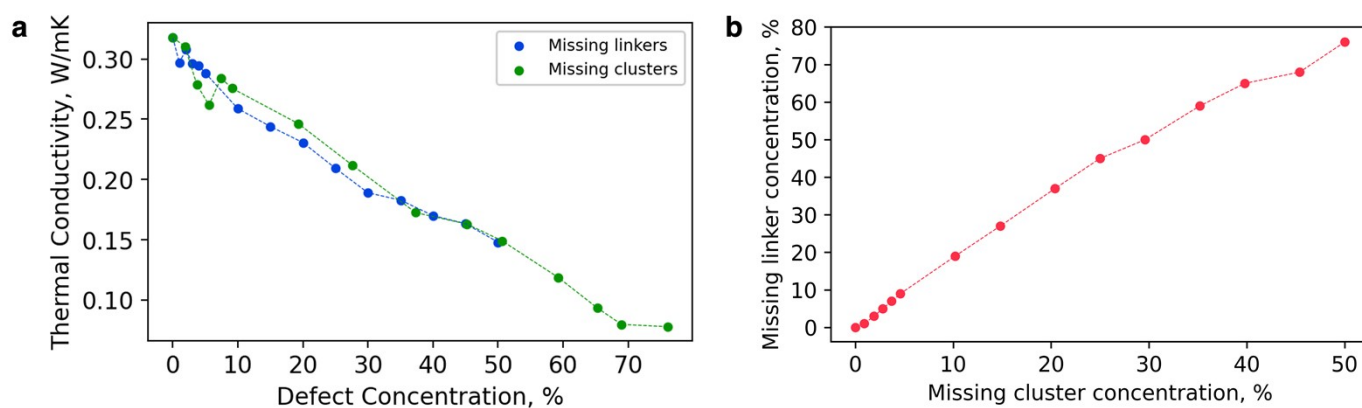

**Figure S5.** (a) Relationship between thermal conductivity and defect concentration, plotted against missing linker defect concentration as the x-axis, for UiO-66 with randomly incorporated missing linker and missing cluster defects (one replicate only). (b) Corresponding missing linker concentration as a function of missing cluster concentration for randomly incorporated missing cluster defects.

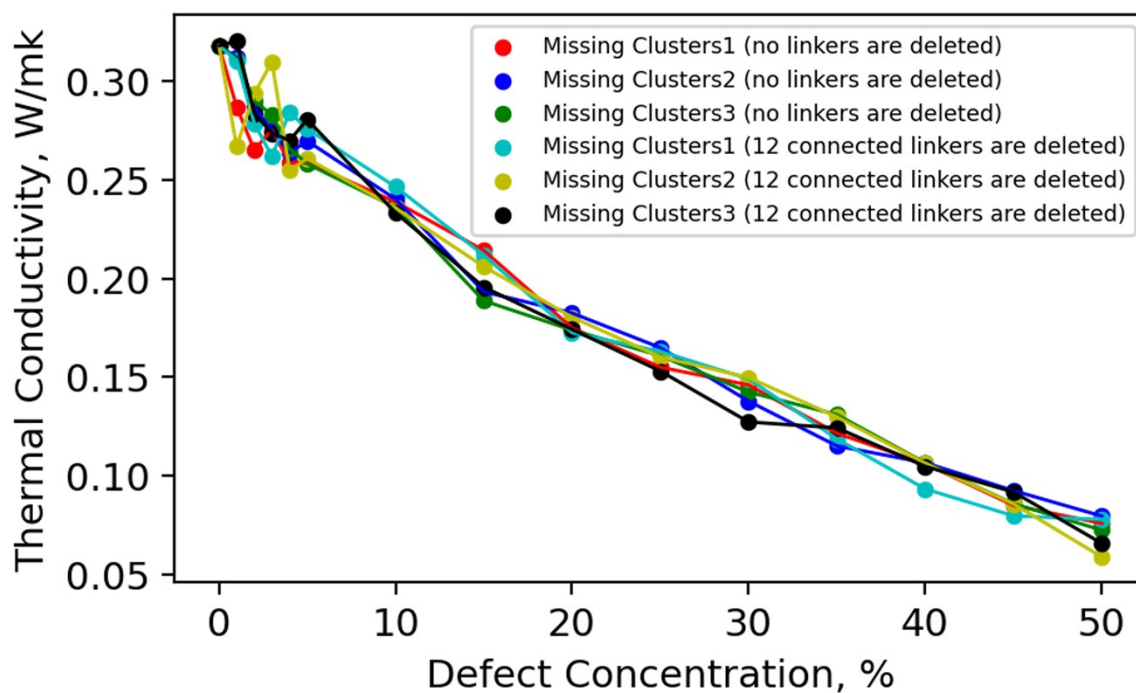

**Figure S6.** Relationship between thermal conductivity and randomly incorporated missing cluster defect concentrations, considering the deletion and non-deletion of all 12 linkers connected to the node.

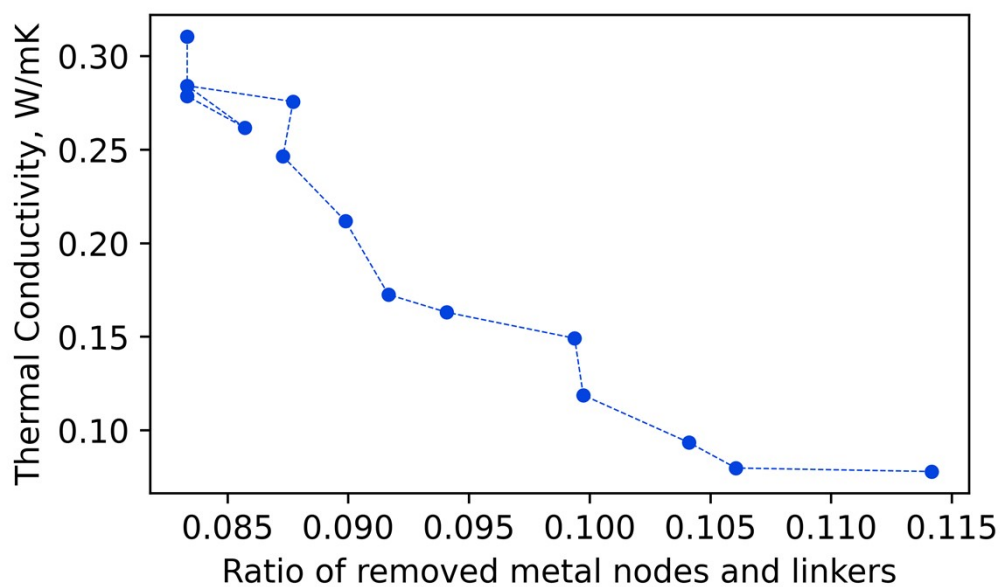

**Figure S7.** Relationship between thermal conductivity and the ratio of removed metal nodes to linkers for defective UiO-66 with randomly incorporated missing cluster defects.

### 3. Relationship between mass density and defect concentration.

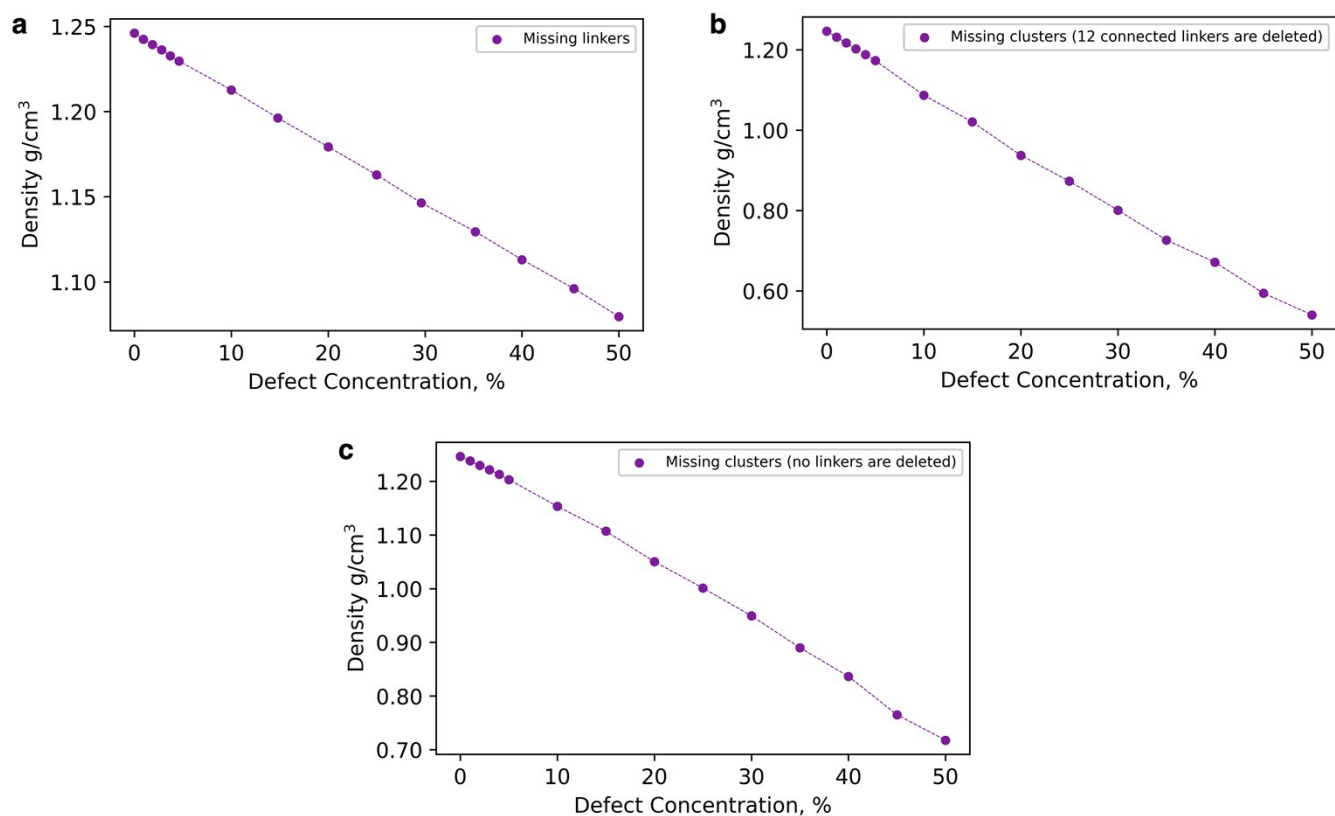

**Figure S8.** Relationship between mass density and defect concentration for UiO-66 with randomly distributed defects: **(a)** missing linker defects; **(b)** missing cluster defects where all connected 12 linkers are deleted; **(c)** missing cluster defects where no linkers are deleted.

### 4. Phonon dispersion relations.

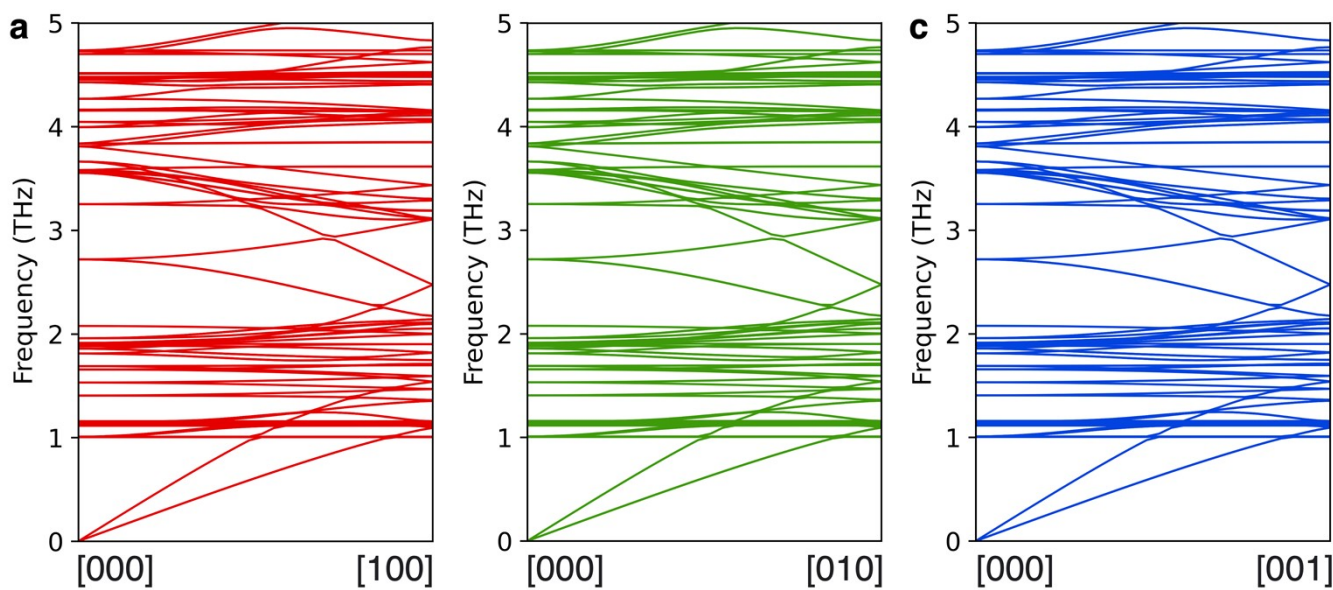

**Figure S9.** Phonon dispersion curves for pristine UiO-66.



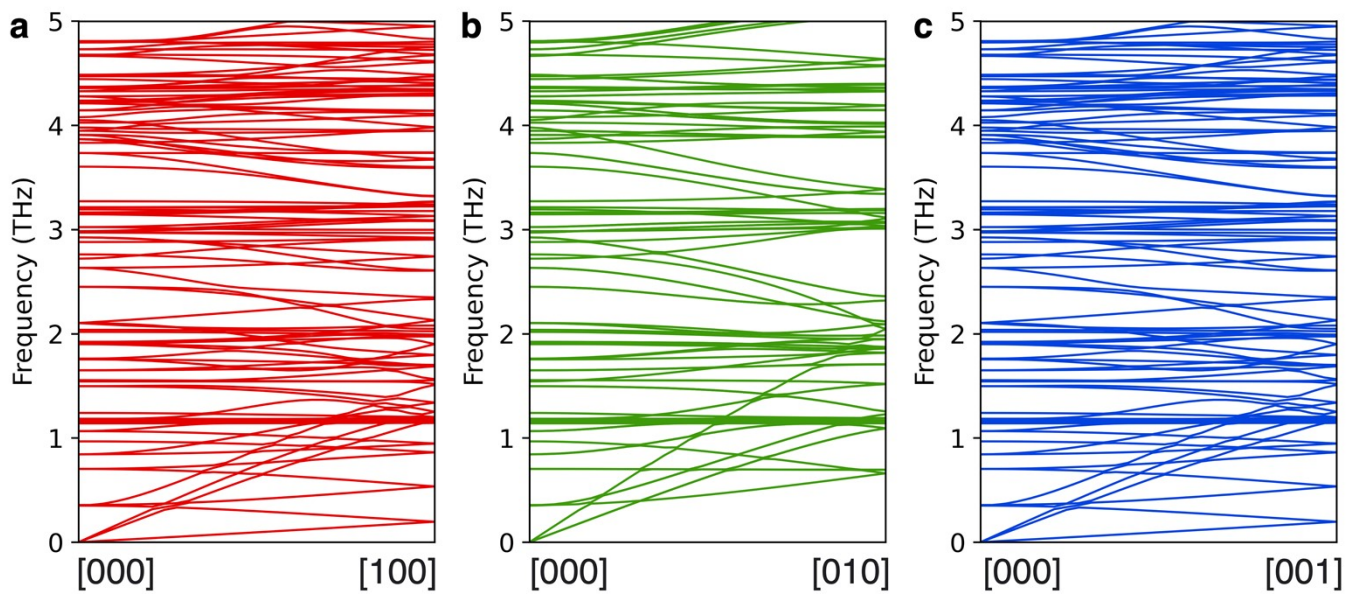

**Figure S10.** Phonon dispersion curves for defective UiO-66 with correlated missing linker defects (**bcu**).

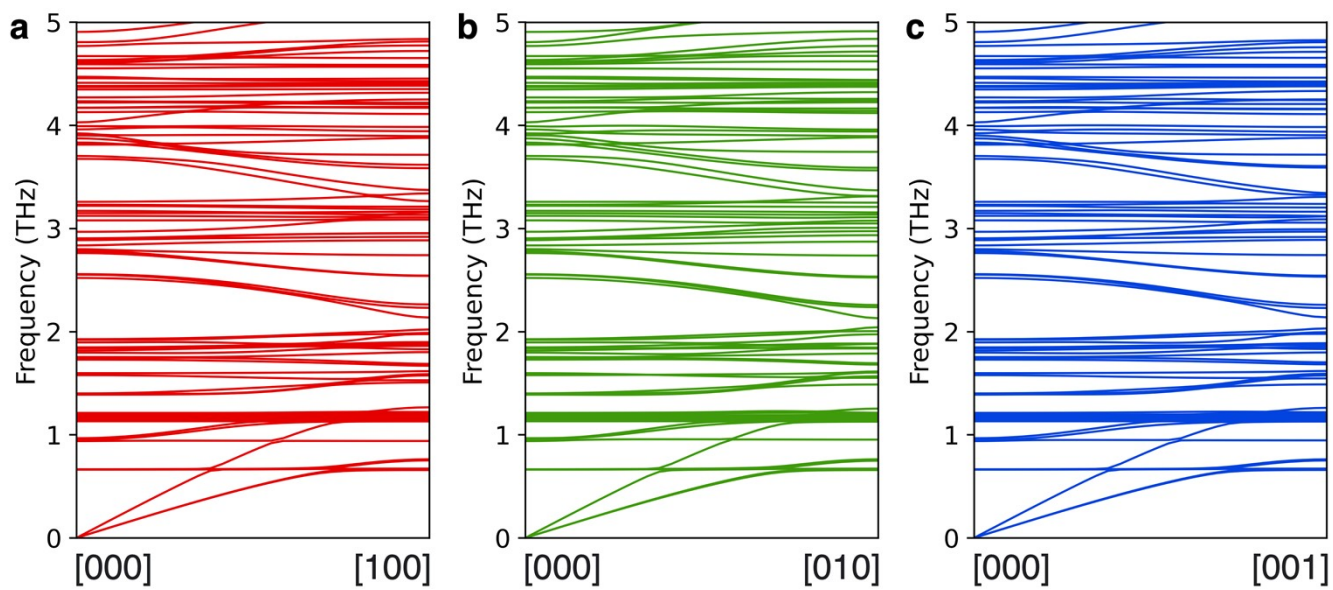

**Figure S11.** Phonon dispersion curves for defective UiO-66 with correlated missing cluster defects (**reo**).

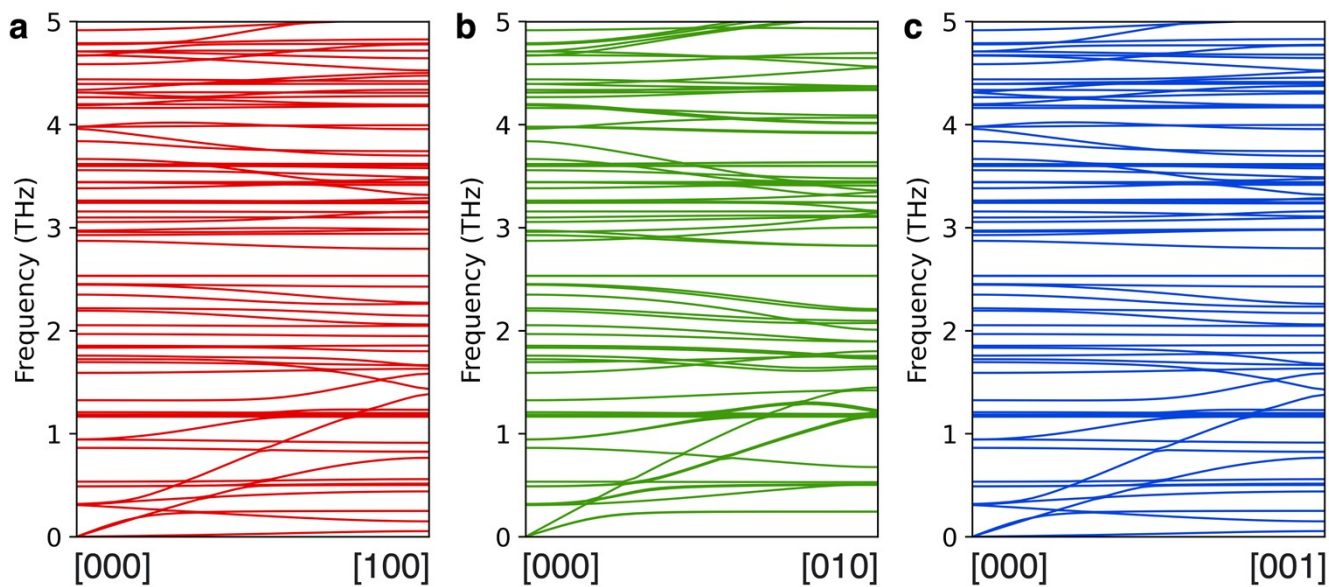

**Figure S12.** Phonon dispersion curves for defective UiO-66 with correlated missing cluster defects (**scu**).

### 5. Phonon density of states (DOS).

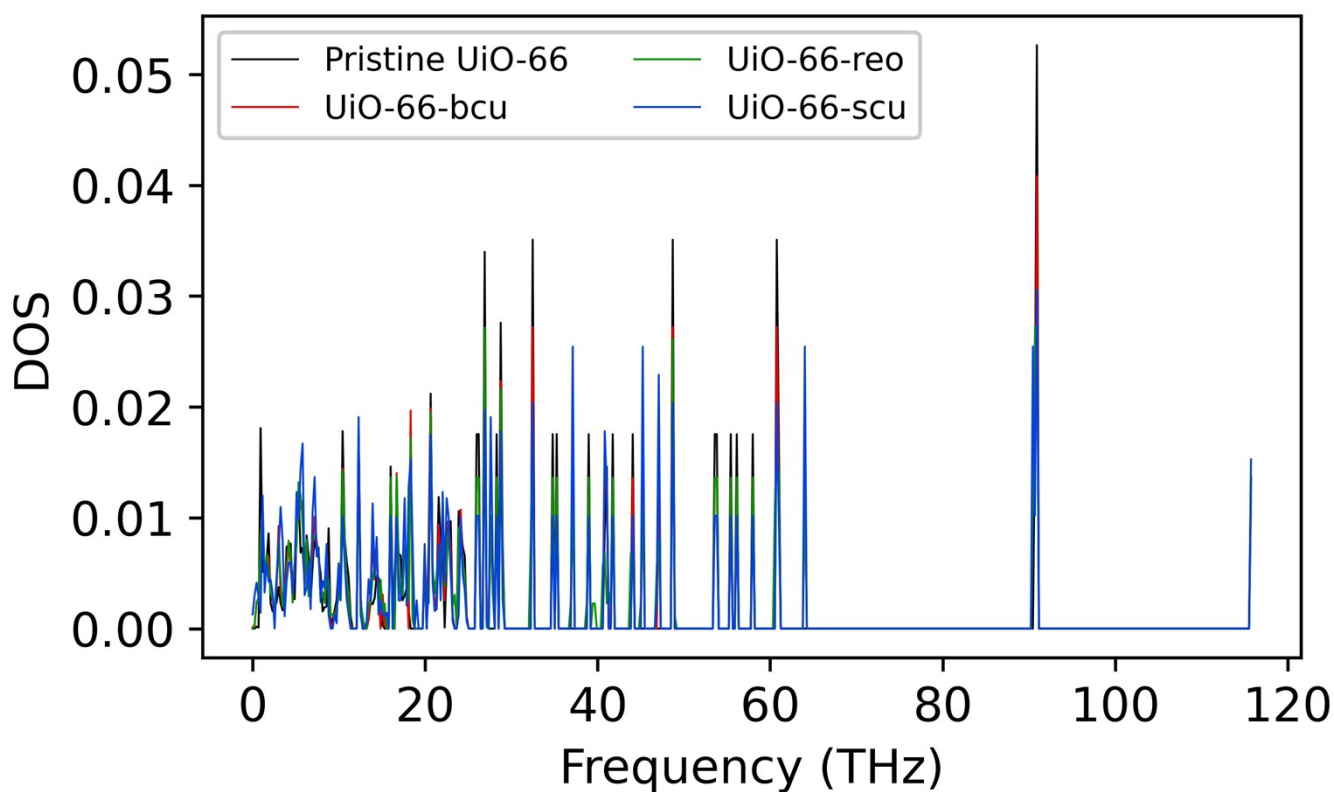

**Figure S13.** Vibrational density of states (DOS) for pristine UiO-66 and defective UiO-66 with correlated defects (**bcu**, **reo**, and **scu**).
